# Supplementary material for: Production of doxorubicin-loaded PCL nanoparticles through a flow-focusing microfluidic device: encapsulation efficacy and drug release
Source: Royal Society of Chemistry journal article supplement (doi:10.1039/d1sm01070k), 2021-01-01
Supplement: d1sm01070k1.pdf [file d1sm01070k1.pdf]

## Supplementary information

### **Production of Doxorubicin-Loaded PCL Nanoparticles through a Flow Focusing Microfluidic Device: Encapsulation efficacy and drug release**

Fazlollah Heshmatnezhad <sup>a</sup>, Ali Reza Solaimany Nazar <sup>a,\*</sup>, Halimeh Aghaei <sup>a</sup>, Jaleh Varshosaz <sup>b</sup>

<sup>a</sup> *Department of Chemical Engineering, University of Isfahan, Isfahan, Iran*

<sup>b</sup> *Department of Pharmaceutics, Isfahan University of Medical Sciences, Isfahan, Iran*

*E-mail address: [asolaimany@eng.ui.ac.ir](mailto:asolaimany@eng.ui.ac.ir)*

#### *S1. DOX/PCL NPs preparation by the bulk method*

The prepared organic phase with a concentration of 100 µg/ml of DOX drug was added to a certain volume of the water containing the surfactants of PVA and Tween 80. Also, the DMF solvent was evaporated under reduced pressure into a vacuum oven. It must be noted that the experiments are performed at ambient temperature.
